2 **The first set of universal nuclear protein-coding loci markers for avian phylogenetic and**  
3 **population genetic studies**

4

Yang Liu<sup>1§</sup>, Simin Liu<sup>1§</sup>, Chia-Fen Yeh<sup>2</sup>, Nan Zhang<sup>1</sup>, Guoling Chen<sup>1</sup>, Pinjia Que<sup>3</sup>, Lu Dong<sup>3\*</sup>, Shou-  
6 hsien Li<sup>2\*</sup>

1 State Key Laboratory of Biocontrol, Department of Ecology/School of Life Sciences, Sun Yat-sen  
8 University, Guangzhou, 510275, Guangdong, China

2 Department of Life Sciences, National Taiwan Normal University, Taipei, 116, Taiwan, China

10 3 Ministry of Education Key Laboratory for Biodiversity Science and Ecological Engineering, College  
of Life Sciences, Beijing Normal University, Beijing, 100875, China

12

\***Correspondence:** Lu Dong, Email: donglu@bnu.edu.cn

14

Shou-hsien Li, Email: t43028@gmail.com

§ These authors equally contributed to this work.

16

**Running header: Universal avian nuclear markers**

18

**Number of words in main body of paper: 4376**

20

**Number of references: 88**

22

24

26 **Abstract**

Multiple nuclear markers provide genetic polymorphism data for molecular systematics and population  
28 genetic studies. They are especially required for the coalescent-based analyses that can be used to  
accurately estimate species trees and infer population demographic histories. However, in avian  
30 evolutionary studies, these powerful coalescent-based methods are hindered by the lack of a sufficient  
number of markers. In this study, we designed PCR primers to amplify 136 nuclear protein-coding loci  
32 (NPCLs) by scanning the published Red Junglefowl (*Gallus gallus*) and Zebra Finch (*Taeniopygia*  
*guttata*) genomes. To test their utility, we amplified these loci in 41 bird species representing 23 Aves  
34 orders. The sixty-three best-performing NPCLs, based on high PCR success rates, were selected which  
had various mutation rates and were evenly distributed across 17 avian autosomal chromosomes and  
36 the Z chromosome. To test phylogenetic resolving power of these markers, we conducted a Neoavian  
phylogenies analysis using 63 concatenated NPCL markers derived from 48 whole genomes of birds.  
38 The resulting phylogenetic topology, to a large extent, is congruence with results resolved by previous  
whole genome data. To test the level of intraspecific polymorphism in these makers, we examined the  
40 genetic diversity in four populations of the Kentish Plover (*Charadrius alexandrinus*) at 17 of NPCL  
markers chosen at random. Our results showed that these NPCL markers exhibited a level of  
42 polymorphism comparable with mitochondrial loci. Therefore, this set of pan-avian nuclear protein-  
coding loci has great potential to facilitate studies in avian phylogenetics and population genetics.

44

Although the next generation sequencing technologies have produced sequences data in the  
46 unprecedented quantity with relative low cost<sup>1</sup>, traditional Sanger sequencing still has its niche in  
molecular evolutionary studies: pilot or small scale phylogenetic studies using PCR-based approach are  
48 cost-effectively and nearly available for every laboratory, beneficial to design sampling strategy and  
built an analysis scheme. By comparing molecular phylogenies based on different sizes of dataset,  
50 Rokas et al.<sup>2</sup> proposed that concatenation of a sufficient number of unlinked genes (>20) can  
overwhelm incongruent branches of the Tree of Life (TOL). Furthermore, tracing backwards from  
52 multiple genetic polymorphisms to find the most recent common ancestor (MRCA) of a group of  
individuals provides a sophisticated approach to clarify phylogenetic relationships among species  
54 (species tree approach) and to reconstruct the demographic history of populations<sup>3,4</sup>. However, the  
major drawback of this approach is the PCR performance of primers developed from one species is  
56 often unpredictable in the distantly related species; consequently, it is a time and cost consuming  
process to evaluate the performance of primers in a previously untested species. Therefore, a set of  
58 universal nuclear markers could provide an efficient way to ease this time consuming process. It should  
greatly facilitate the use of coalescent-based analyses to answer phylogenetic and population genetic  
60 questions<sup>5</sup>.

Nuclear Protein-coding Loci (NPCLs) are exons without flanking introns<sup>6</sup>, and are widely used in  
62 interspecific phylogenetic studies (e.g. *RAG1*<sup>7</sup>, *c-myc*<sup>8,9</sup>). NPCL markers possess favorable properties  
including homogeneous base composition, varied evolutionary rates and easy alignment across species  
64 or populations<sup>10,11</sup>. Moreover, orthologous genes can be identified accurately using their annotations  
<sup>12,13</sup>. Several sets of universal NPCL markers had been developed specially for beetles<sup>14</sup>, fish<sup>15</sup>,  
66 reptiles<sup>6</sup>, amphibian and vertebrates<sup>16,17</sup>. However, there is still no sufficient number of easily

amplifiable NPCL markers that can fulfill the needs of modern coalescent-based analysis for most of  
68 bird species. As the most common and species-rich group of terrestrial vertebrates, birds exhibit  
tremendous diversity in their phenotypes, ecology, habitats and behaviors<sup>18</sup>. So far, a considerable  
70 effort has been devoted to resolve the phylogenetic relationships from higher taxonomic categories<sup>19–21</sup>  
to sister species<sup>22–26</sup>. In addition to phylogenetics, modeling-based approaches using multiple nuclear  
72 genes have also shed light on population structure and demographic history and allowed inferences of  
selection pressures in non-model organisms<sup>27–30</sup>. The rapid advance in these sub-disciplines in  
74 evolutionary biology always hinges upon proper sampling design and a rigorous statistical approach,  
but it also requires data on multiple independent loci with an appropriate level of genetic  
76 polymorphism<sup>31</sup>, which allows the application of sophisticated modeling and thus hypothesis testing.

78 Efforts of developing universal PCR primers have facilitated avian phylogenetic and population  
genetic studies<sup>32–34</sup>. For example, Dawson et al.<sup>35</sup> developed a set of microsatellite markers with high  
80 cross-species utility, suitable for paternity and population studies. Backström et al.<sup>36</sup> developed more  
than 200 exons flanking introns, which were evenly distributed throughout the avian genome.  
82 However, a variable number of indels (insertions and deletions) in the intron complicate the subsequent  
amplification, sequencing and alignment of these exons. Conserved and easily aligned exonic regions  
84 are ideal alternatives to compensate for resolving power for phylogenetic reconstruction<sup>13</sup>. Kimball et  
al.<sup>37</sup> tested the utility of 36 published markers on 42–199 bird species with only five exonic markers  
86 therein. Kerr et al.<sup>38</sup> developed 100 exonic markers from five avian genomes, and finally tested a subset  
of 25 markers in 12 avian orders. The quantity of NPCL markers is far from adequate as exon length  
88 should be longer than intron sequences to yield sufficient phylogenetic resolution<sup>39</sup>. Using a small

number of universal NPCL markers could increase the probability of error when estimating species  
90 relationships due to the conflict of gene tree topologies. To overcome the problem, it has been  
advocated to use more genes with longer sequences<sup>40</sup>. However, some obstacles have hindered the  
92 development of universal NPCL markers. Firstly, widespread flanking introns make the identification  
of the exon boundaries of a specific NPCL marker difficult<sup>6</sup>. Secondly, multiple nuclear loci are  
94 required to be distributed evenly and widely across the whole genome in order to indicate a variety of  
historical signals. And finally, low-cost and easy amplification are important requisites. The  
96 development of a universal set of NPCL markers for birds should significantly reduce the time required  
for future research as well as its cost, and facilitate the application of coalescent-based methods in  
98 avian evolutionary studies.

In this study, we aimed to develop a set of avian universal NPCL markers that can be widely  
100 utilized in avian phylogenetic and population genetic studies. By comparing the published genomes of  
the Red Junglefowl (*Gallus gallus*) and the Zebra Finch (*Taeniopygia guttata*), we designed 136 pairs  
102 of NPCL primers and amplified them in 41 species representing 23 avian orders to check their  
versatility. To test the resolving power of these markers, we further constructed a phylogenetic tree and  
104 estimated mutation rates by extracting universal NPCLs from 48 published avian genomes<sup>41</sup>. Moreover,  
samples from four populations of the Kentish Plover (*Charadrius alexandrinus*) were also amplified to  
106 estimate the intra-specific polymorphic level of these universal NPCLs.

## 108 **Results**

### *Pan-avian order amplifications of the novel NPCLs*

110 The genome alignment and BLAST procedures resulted in 136 NPCL candidates, which were broadly  
distributed across 24 autosomal chromosomes and the Z chromosome of the Zebra Finch genome.  
112 Their original fragment length ranged from 815bp to 7176bp (Supplementary Table S1). We thus  
nominated each NPCL marker using abbreviation of the associated protein-coding regions according to  
114 gene annotation of Zebra Finch (Supplementary Table S1). More than one primer pairs were conducted  
for each NPCL marker candidate, and we finally chose the pair of PCR markers with the highest score  
116 denoting the level of conservatism between Zebra Finch and Red Junglefowl genomes.

In total, 5,146 PCRs were performed to amplify the 136 NPCLs in 41 species representing 23  
118 avian orders (Fig. 1A). Among them, 2,875 (55.9%) of PCR performances produced a target band  
(Supplementary Table S3). For the 136 candidates, we successfully amplified 12 NPCLs in all 23  
120 orders, with 100% PCR success rate (PSR). Sixty three of the 136 candidate NPCL markers had a  
relatively good overall PCR performance ( $PSR \geq 80\%$ ) (Fig. 2A); all of them were successfully  
122 amplified in *Caprimulgiformes* and *Gruiformes*, and the PSR ranged from 65% to 97% in other orders  
(Fig. 1B, Supplementary Table S3). This set of 63 universal avian nuclear markers was distributed  
124 across 17 autosomal chromosomes and the Z chromosome (Fig. 3).

### 126 *Interspecific mutation rate and phylogenetic construction of the 63 universal NPCLs*

The genome-based BLAST results showed that the widely used genetic markers, cytochrome *b* (*cyt b*)  
128 of mitochondrial DNA(mtDNA) and *RAG1*, an extensively used nuclear gene<sup>42,43</sup> were located in all 48  
published genomes<sup>41</sup>. For the newly developed NPCLs, we located 56 loci across all 48 avian genomes.  
130 Among the remaining seven NPCLs, six of them were located in 47 genomes and two missing data  
recorded at the locus *FUT10*. Combined, BLAST results confirmed the set of 63 universal NPCL

132 markers were orthologous among these 48 species (Supplementary Table S4) and the resulting  
concatenated matrix with sequences of approximately 96 kb was obtained.

134 The range of the estimated mutation rates for the universal avian NPCLs is broad; it ranged from  
0.0997 to  $0.7317 \times 10^{-8}$  per site per million years (Fig. 2B). Among these 63 NPCLs, the mutation rates  
136 of 27 were slower than the mutation rate of *RAG1*, whilst the other 36 NPCLs were faster. All NPCLs  
showed a slower mutation rate than that of the mitochondrial *cyt b*.

138 We constructed a Maximum Likelihood (ML) tree based on 63 concatenated NPCLs from 48  
species, representing 34 orders of extant birds (Fig. 4). The resulting topology is largely similar with  
140 the recent phylogenomic studies<sup>41,44,45</sup>. Neoaves and Galloanseres, which united in the infraclass  
Neognathae, as well as Palaeognathae were three major groups with highest bootstrap support (100%).  
142 Among Neoaves group, two major clades, core landbirds (Telluraves) and core waterbirds  
(Aequornithia) were strongly supported by whole-genome data<sup>41</sup> and 259 independent nuclear loci<sup>44</sup>.  
144 Within core landbirds, the clade containing Passerimorphae (Passeriformes + parrots), Falconiformes  
(falcons), Cariamiformes (seriemas) is sister to Craciimorphae (bee-eaters + woodpeckers + hornbills +  
146 trogons + cuckoo-roller + mousebirds), which is paraphyletic to Strigiformes (owls) and its sister clade  
Accipitrimorphae (eagles + New World vultures). Within core waterbirds, Pelecanimorphae (pelicans +  
148 herons + ibises+cormorants) and Procellariimorphae (fulmars + penguins) are two monophyletic groups,  
sister to Gaviimorphae (loons). Other clades such as Phoenicopterimorphae (flamingos + grebes),  
150 Otidimorphae (bustards + turacos + cuckoos), Caprimulgimorphae (hummingbirds + swifts + nightjars)  
and Phaethontimorphae (tropicbirds + sunbitterns) are identical with previous studies<sup>41,45,46</sup>. However,  
152 we also found discordances between this phylogenetic tree and previous results<sup>41,44-46</sup>, specifically in  
some branches with conflict placements with low support. For example, Columbiformes (doves),

154 Pterocliiformes (sandgrouses) and Mesitornithiformes (mesites) are not clustered into Columbimorphae.

The placement of Charadriiformes (plovers), Gruiformes (cranes) and Opisthocomiformes (hoatzins)

156 are incongruence with Jarvis et al<sup>41</sup>, respectively.

### 158 *Intraspecific polymorphism of 17 randomly selected NPCL markers*

A total of 12,420bp DNA sequences, including 11,196bp of 17 NPCLs and 1,224bp of two

160 mitochondrial loci were sequenced in 40 samples representing four populations of the Kentish Plover.

The NPCL markers showed varied degrees of polymorphism, with the exception of locus *KBTD8*

162 (Fig. 5). There were 10 polymorphic sites in loci *BIRC2* and *FMN2*, while there were only 1-6

polymorphic sites in other loci. Correspondingly, *BIRC2* and *FMN2* possessed the highest values of

164 haplotype and nucleotide diversity (mean  $Hd$ = 0.84 and 0.92, mean  $\pi$ = 0.0047 and 0.0040,

respectively). In contrast, a mitochondrial gene *ND3* had only one polymorphic site, yielding a low

166 haplotype (mean  $Hd$ = 0.36) and nucleotide diversity (mean  $\pi$ = 0.0009). When we combined the results

on interspecific mutation rates and intraspecific polymorphism, we found that the inter- and

168 intraspecific genetic diversity of our gene markers were incongruent; although the estimated mutation

rates at the study NPCLs were all much lower than that of mitochondrial gene *cyt b*, the intraspecific

170 polymorphism at nine NPCL markers was higher than that of two mitochondrial genes.

The genetic polymorphism parameters varied greatly, not only among genes, but among

172 populations as well. For example, the  $Hd$  value of the *MAML3* gene was lowest in the Taiwan

population ( $Hd$ = 0.51) and highest in the Qinghai population ( $Hd$ = 0.88). The measure for nucleotide

174 diversity,  $\pi$  of the *NCOA6* gene was lowest in the Taiwan population ( $\pi$ = 1.59) and highest in the

Guangxi population ( $\pi$ = 3.81). Detailed information on measures from each population is available in



176 Supplementary Table S5. The HKA test suggested no departure from the neutral expectation for any of  
the 17 NPCL markers. Similarly, the test of Tajima's  $D$  showed that none of the 17 NPCL markers  
178 deviated significantly from neutrality (Supplementary Table S5).

## 180 **Discussion**

We developed a set of 63 avian universal NPCL markers with diverse mutation rates and levels of  
182 intraspecific polymorphism. Our results showed that the 63 NPCL markers were successfully amplified  
in most of the species tested, representing 23 extant orders across major lineages of the avian tree of  
184 life (PCR success rate >80%), and denoted different levels of inter- and intraspecific polymorphism.  
Therefore, our NPCL set will provide a highly versatile genetic toolkit for a broad range of molecular  
186 phylogenetic and ecological applications. Moreover, the genetic marker system we provide here is  
cheap and easy to apply. Any molecular laboratories that are capable of performing PCRs can adopt  
188 our marker system effortlessly. Hence, this novel set of universal NPCL markers has great potential to  
be widely applied in evolutionary biology studies in birds.

190 Inherited from different chromosomes, concatenation of nuclear markers contribute multiple  
independent estimates to species trees<sup>47,48</sup>, in order to alleviate the node conflicts of gene trees caused  
192 by incomplete lineage sorting, horizontal gene transfer, inconsistent evolutionary rates, gene  
duplication and/or gene loss and so on<sup>49,50</sup>. We constructed an avian phylogenetic tree using  
194 concatenation of 63 NPCLs across 18 chromosomes from 48 genomes. The result is largely similar  
with previous phylogenomic works using different data types like multiple nuclear loci<sup>41,44</sup>, introns<sup>20</sup>,  
196 ultraconserved elements (UCEs)<sup>46,51</sup> and retroposon presence/absence matrix<sup>45</sup>. The congruent parts of  
topology reveal multiple cluster clades, such as Telluraves (core landbirds), Aequornithes (core

198 waterbirds) and Phoenicopterimorphae, Otidimorphae, Caprimulgimorphae and Phaethontimorphae.  
We also find some unresolved placements comparing with Jarvis et al<sup>41</sup>. These include Columbiformes  
200 (doves), Pterocliiformes (sandgrouses), Mesitornithiformes (mesites), Charadriiformes (plovers) and  
Gruiformes (cranes), which exhibits hard polytomies in the avian tree of life. Though recent efforts in  
202 avian phylogenomic studies using whole-genome<sup>41</sup> or genome-level data<sup>44</sup>, irresolvable relationships  
have been found in some clades<sup>41,44-46</sup>. Suh et al.<sup>45</sup> investigated the causes of phylogenetic  
204 irresolvabilities and concluded that such phylogenetic discordances were originated from prevalent  
ancestral polymorphism denoted by incomplete lineage sorting (ILS)<sup>52</sup>, which is probably associated  
206 with an initial near-K-Pg super-radiation<sup>41</sup> in Neoaves. Unlike the two other main radiations that gave  
rise to the core waterbirds and core landbirds clades, the massive near-K-Pg super-radiation in  
208 Neoaves, containing several unresolved lineages, leads extreme ILS and associated network-like  
phylogenetic relationships<sup>45-46</sup>. On one hand, again, the topology reconstructed by the present set of  
210 universal NPCL markers captures these patterns, and suggests hard polytomies due to biological  
limitation of phylogenetic methods. On the other hand, it implies that our NPCL markers have  
212 sufficient polymorphism to resolve phylogenetic relationships among lineages with less ILS in  
Neoaves.

214 We also found that this set of novel NPCL markers has the potential to be applied in population  
genetic studies, in which researchers usually prefer to use abundant markers with high mutation rates.  
216 For example, microsatellites were developed for specific species or orders to detect differences in  
genotypes and further to quantify intraspecific genetic diversity<sup>35,53,54</sup>. But introns like microsatellites  
218 have high levels of length homoplasy<sup>55</sup>. It is commonly assumed that NPCLs are conservative loci,  
highly suitable to address questions concerning high-level systematics<sup>40</sup>. However, some population

220 genetic studies highlight the importance of using functional exonic SNPs in population genetic  
studies<sup>11,56</sup>, comparing to neutral markers (such as microsatellite and mitochondrial DNA). Datasets  
222 that contain numbers of several to more than 100 exon genes<sup>51,57</sup> can support accurate and reliable  
estimates of population genetic parameters<sup>55,58</sup>, and have a substantial power in population genetic  
224 analysis<sup>5,40,50,59</sup>. Studying 17 NPCL markers in the Kentish Plover, we found that sixteen had low to  
moderate levels of intraspecific polymorphism and nine of them showed higher genetic diversity than  
226 mitochondrial genes in this study. Although a previous study showed a low level of genetic  
differentiation across Eurasian populations<sup>60</sup>, this species exhibits variability in morphology and  
228 behavior among and within populations in East Asia<sup>61</sup>, warranting further coalescent-based analysis of  
their evolutionary history. This dataset provides sufficient information to study population genetics in  
230 the Kentish Plover in East Asia.

In order to infer correct phylogenetic relationships in different taxonomic levels, it is essential to  
232 choose unlinked genes with different mutation rates<sup>62</sup>. Our novel set of NPCL markers offer a wide  
range of mutation rates. The comparisons of mutation rates between the new NPCL markers with  
234 commonly used nuclear loci *RAG1*<sup>7</sup> and some loci at mtDNA<sup>63</sup> provide a reference for marker choice  
(Figure 2B, 5). In principal, it is advisable to use markers with slow mutation rates to resolve deep  
236 nodes and fast mutation rates to population genetic studies. Moreover, coalescent theory is widely used  
to estimate species tree and population demographic parameters, such as divergence times<sup>64,65</sup> and  
238 effective population sizes ( $N_e$ )<sup>59</sup>. The associated analyses, such as species-tree estimation, e.g. MP-  
EST<sup>66</sup>, \*BEAST<sup>67</sup>, BP&P<sup>68</sup>, and demographic analysis, such as Isolation with Migration (IM)  
240 model<sup>69,70</sup> and Approximate Bayesian Computation (ABC) simulations<sup>59</sup> require multiple independent  
loci with different demographic histories and mutation rates. In this regard, markers from different

242 genomic segments, such as introns (developed previously<sup>35-37</sup>) and exons we developed are preferred to  
combine and to be used. It is no doubt that the present marker set is a useful resource to generate  
244 multilocus datasets for avian evolutionary studies in different taxonomic levels. In fact some studies  
have used these novel NPCL markers to apply the aforementioned analyses<sup>25,30</sup>.

246 Compared with traditional Sanger sequencing, the fast development of next generation  
sequencing (NGS) techniques has enabled researchers to obtain genetic polymorphisms easily<sup>71</sup>. For  
248 example, Jarvis et al.<sup>41</sup> performed a highly resolved phylogenetic tree of 48 species using  
phylogenomic methods, and Prum et al.<sup>44</sup> conducted a comprehensive phylogeny of 198 species within  
250 the Neoaves, which diversified very quickly, using genome-scale data by targeted NGS. Multilocus  
methods do not use as much as genomic data. However, we consider that this set of universal NPCL  
252 markers has its niche in avian molecular studies. Sanger sequencing technique of NPCL markers is less  
sensitive to the quality of template DNA like sequence capture approach than other genomic  
254 approaches. Degraded DNA or a small quantity of DNA is also workable, like feather and museum  
samples. It is always a tradeoff between template DNA quality and PCR product length. With the novel  
256 NPCL markers, we aimed to amplify a fragment of 700-1200 bp sequence of each locus. Hence they  
should be applicable to avian blood, tissue and feathers. Moreover, a thorough analysis pipeline for  
258 traditional PCR-based method is available, supported by a series of visualized operating software, e.g.  
MEGA, DNASTAR, DnaSP, BEAST and etc., which are widely used in molecular phylogenetic  
260 analysis. Processing genomic data always places high demands on bioinformatics and computational  
power<sup>72</sup>. High-quality samples for NGS, project budget, bioinformatic facilities are not available to all  
262 laboratory. It is still useful and necessary to align orthologous sequences across multiple hierarchical  
levels using NPCL markers, especially for a pilot or small scale study.

264            However, there are some limitations when using this set of universal NPCL markers. Firstly,  
PCR performances were simultaneously tested under a unified protocol (e.g.  $T_m=50^\circ\text{C}$ ), so that the  
266 PSR of each NPCL marker might be underestimated. Reducing the annealing temperature by  $1\sim 2^\circ\text{C}$   
would improve the success rate in practice. There is also the possibility that PCR produced target  
268 sequences but also non-specific amplicons. We could slightly raise the annealing temperature to  
increase specificity or perform extra steps including gel purification and cloning. Furthermore, the  
270 interspecific polymorphic parameters of the 17 NPCL markers are reference values for Kentish plovers.  
Different evolutionary forces, such as genetic drift or natural selection, can act on different regions of  
272 the genome, causing a various evolutionary rates and demographic histories in different species<sup>73</sup>.  
Thus, different combinations of markers are important for specific questions. For example, NPCL  
274 markers on the Z chromosome could be selected to solve questions involving sexual selection and mate  
choice. There is also a trade-off between the number of markers and time- and cost-efficiency. In avian  
276 phylogenetic analysis, random errors can be reduced by employing more markers, whilst, as a  
consequence of this procedure, systemic errors would increase due to differences in nucleotide  
278 composition and various mutation rates<sup>74</sup>. Kimball et al. proposed that adopting various analytical  
methods might overcome these adverse effects<sup>75</sup>.

280            In conclusion, we have developed 63 avian universal NPCL markers, evenly distributed across 17  
autosome chromosomes and the Z chromosome. This set of universal NPCL markers had high PCR  
282 success rates (PSR>80%) in 23 avian orders. Its wide range of mutation rates are suitable to resolve  
phylogenetic relationships at both low and high-level. Furthermore, various intraspecific polymorphisms  
284 are potentially useful to provide deep-level divergence and demographic information for population  
genetics. Though high-throughput genetic polymorphism data from next generation sequencing

286 undoubtedly provide a more comprehensive vision for avian evolutionary history and genomic patterns,  
we believe that this set of exonic markers provides a relatively reliable and repeatable solution and could  
288 have widespread application in phylogenetic and population genetics studies.

## 290 **Methods**

### *Development of NPCL markers and primer design*

292 To screen NPCL marker candidates, we aligned parts of the genome of two species with a distant  
phylogenetic relationship<sup>76</sup>, the Red Junglefowl (GCA\_000002315) and the Zebra Finch  
294 (GCA\_000151805). Firstly we identified long (>600bp) single-copy exons within the genome of the  
Zebra Finch and took these exons as templates. Then we aligned them with the genome of the Red  
296 Junglefowl using BLAST (Basic Local Alignment Search Tool). We assumed that query sequences of  
the Red Junglefowl with identity more than 80% and length more than 50% of templates length were  
298 orthologous exons and employed them as NPCL marker candidates.

We used the program Primer3<sup>77</sup> to design the primers for NPCL marker candidates. We selected  
300 exon sequences of Zebra Finch as templates, focusing on High-scoring Segment Pairs region (700-  
1200bp). For each primer pair, the oligomer ranged from 18bp to 25bp and GC content ranged from  
302 20% to 80%. Furthermore, we tested a single primer for self-complementarity by setting  
complementarity score to less than 6.00, so as to predict the tendency of primers to anneal to each other  
304 without necessarily causing self-priming in the PCR. Complementarity 3' score was set as default (<  
3.00) to test the complementarity between left and right primers.

306

### *Tests on the universality of the NPCL markers*

308 To test the amplification performance of these new NPCL markers, we selected 41 species of 23  
representative Aves orders (Supplementary Table S2). We used a set of 10000 trees with 9993  
310 operational taxonomic unites (OTUs) downloaded from <http://birdtree.org/> to demonstrate the  
phylogenetic relationships among selected species<sup>18</sup>.

312 Total genomic DNA was extracted from ethanol-preserved muscle tissue or blood using a  
TIANamp Genomic DNA kit (TIANGEN, China) and stored at 4°C. DNA concentration and purity  
314 were estimated by NanoDrop 2000 (Thermo Scientific, USA). We used Touchdown PCR (TD-PCR)<sup>78</sup>,  
an improved standard PCR to test the utility of primers sensitively, by decreasing the annealing  
316 temperature 1°C/cycle from T<sub>m</sub>+10°C to T<sub>m</sub> (Melting Temperature). The Touchdown PCR was  
performed in a Veriti96 PCR thermal cycler system (ABI, USA) using a 10µl reaction containing 2µl  
318 template DNA (10-70ng totally), with mixed concentrations of 10×PCR buffer, 20µM dNTP, 10mM of  
each forward and reverse primer, and 5U Taq polymerase (Takara, China). The initial temperature  
320 profile was 2 min at 94°C, 10 cycles at 94°C for 30s, 60-50°C (decreasing the annealing temperature by  
1°C per cycle) for 30s and 72°C for 90s followed by 30 similar cycles but with a constant temperature  
322 of 50°C. This process was concluded with an extra elongation step at 72°C for 10 min. A successful  
amplification was recorded if a single clear band (target locus) was observable under ultraviolet light  
324 after being isolated on a 1% TAE agarose gel at 120V for 30 min.

### 326 *Estimation of inter-species mutation rates and Construction of Neoavian phylogeny*

We downloaded 48 avian genomes covering all orders of Neoaves<sup>41</sup>. Sixty-five gene sequences,  
328 including the 63 universal NPCLs and two frequently-used genes (*RAG1*, and mitochondrial  
cytochrome *b* (*cyt b*)) as control, were retrieved and aligned in these genomes against genes in Zebra

330 Finch (abbreviation as *Tgu1*) using BLAST. These sequences were extracted and filtered in batches by  
own-developed Perl script in the Tianhe-2 server (School of Advanced Computing, Sun Yat-sen  
332 University). Because of different genome sequence format, the script was unable to retrieve sequences  
in four species, i.e. *Anas platyrhynchos*, *Gallus gallus*, *Meleagris gallopavo* and *Melopsittacus*  
334 *undulates*<sup>41</sup>. Hence, we manually searched and obtained orthologues of the four species using BLAST  
tool on the website <https://blast.ncbi.nlm.nih.gov/Blast.cgi>. We further aligned the obtained NPCL  
336 orthologous sequences using MEGA v6.0<sup>79</sup>.

To estimate the mutation rate of each gene, we firstly computed the overall mean genetic distance  
338 at each NPCL marker in MEGA v6.0 with 1000 bootstrap replicates. Then we calculated the ratio of  
genetic distance between each NPCL and *cyt b*. Finally, we multiplied the ratio by the average mutation  
340 rate in the *cyt b* (0.01035 mutations per site per million years)<sup>80</sup> to get the average mutation rate of each  
NPCL<sup>81</sup>.

342 To construct the phylogenetic relationship of Neoavian birds in order level, we concatenated all  
NPCL sequences and reconstructed the maximum likelihood tree by RAxML v8.2.1<sup>82</sup>, with GTRCAT  
344 model and 1,000 bootstrap runs. Maximum-likelihood-bootstrap proportions  $\geq 70\%$  were considered  
strong support<sup>83</sup>.

346

#### *Intra-species polymorphism measurements*

348 We amplified 17 random NPCLs in 40 Kentish Plover (*Charadrius alexandrinus*) blood samples from  
live-trapped birds in a noninvasive manner. To compare our data with previous genetic analyses on  
350 European populations of the Kentish Plover<sup>84</sup> and compare the degree of polymorphism between  
nuclear and mtDNA, we added two mtDNA loci, ATPase subunit six concatenated with partial ATPase



352 subunit 8 (*ATPase6/8*) and NADH dehydrogenase subunit 3 (*ND3*). Blood samples were collected from  
four breeding populations of plovers, Guangxi (GX), Qinghai (QH), Hebei (HB) and Taiwan (TW)  
354 (Table S2). The same protocol for DNA extraction and PCR amplification was followed as above, and  
the products were sequenced on ABI3730XL (Applied Biosystems, USA) by Beijing Genomics  
356 Institute (BGI, China).

Both strands of the amplicons were assembled, and the heterozygosity of nuclear genes was  
358 detected using SeqMan v7.1.0.44<sup>85</sup>. Some parameters of the DNA polymorphism, the number of  
polymorphic sites (*S*) and haplotypes (*H*), haplotype diversity (*Hd*), and nucleotide diversity ( $\pi$ ) were  
360 calculated using DnaSP v5.0<sup>86</sup>. The neutrality of each locus was tested using the Hudson-Kreitman-  
Aguade (HKA) test<sup>87</sup> and Tajima's *D*<sup>88</sup> implemented in DnaSP v5.0.

362

### 364 **Acknowledgements**

We are grateful to Per Alström, Fuming Lei, Fasheng Zou, Xiaojun Yang, Ulf Johansson, Chung-Yu  
366 Chiang, Jonathan Reeves, Yingyong Wang, Menxiu Tong, Qin Huang, Zhechun Zhang, Xuejing Wang,  
Xin Lin, Jian Zhao for supplying tissue, blood or DNA samples used in this study, and Zhenhao Luo for  
368 providing technical support to BLAST script methods, and Alan Watson for editing the text. This study  
was supported by the National Science Foundation of China (No. 31301875 & No. 31572251 to Yang  
370 Liu; No. 31471987 to Lu Dong, No. 31600297 to Pinjia Que), and the National Key Program of Research  
and Development, Ministry of Science and Technology Grant 2016YFC0503200 to Lu Dong, and some  
372 DNA samples of birds were collected during 'The Comprehensive Scientific Survey of Biodiversity from  
Luoxiao Range Region in China (2013FY111500)'. Computational work was funded by Special Program

374 for Applied Research on Super Computation of the NSFC-Guangdong Joint Fund (the second phase)

under Grant No. U1501501 to Yang Liu.

376

**Author contributions statement**

378 Y.L., SH.L. and D.L. designed this study. CF. Y. and N.Z. carried out the primer design and BLAST  
procedures. GL.C. and PJ.Q. provided materials and technical support in the lab. SM.L. completed wet

380 lab experiments, analyzed the data and wrote the manuscript with Y.L.

382 **Competing interests**

The author declare no competing interests.

384

386 **References**

1. Ansorge, W. J. Next-generation DNA sequencing techniques. *New Biotechnol.* **25**, 195–203  
388 (2009).
2. Rokas, A., Williams, B. L., King, N. & Carroll, S. B. Genome-scale approaches to resolving  
390 incongruence in molecular phylogenies. *Nature* **425**, 798 (2003).
3. Kingman, J. F. C. On the genealogy of large populations. *J. Appl. Probab.* **19**, 27–43 (1982).
- 392 4. Tajima, F. Evolutionary relationship of DNA sequences in finite populations. *Genetics* **105**,  
437–460 (1983).
- 394 5. Delsuc, F., Brinkmann, H. & Philippe, H. Phylogenomics and the reconstruction of the tree of  
life. *Nat. Rev. Genet.* **6**, 361–375 (2005).
- 396 6. Townsend, T. M., Alegre, R. E., Kelley, S. T., Wiens, J. J. & Reeder, T. W. Rapid development  
of multiple nuclear loci for phylogenetic analysis using genomic resources: An example from  
398 squamate reptiles. *Mol. Phylogenet. Evol.* **47**, 129–142 (2008).
7. Groth, J. G. & Barrowclough, G. F. Basal divergences in birds and the phylogenetic utility of  
400 the nuclear RAG-1 gene. *Mol. Phylogenet. Evol.* **12**, 115–123 (1999).
8. Ericson, P. G. P., Johansson, U. S. & Parsons, T. J. Major divisions in oscines revealed by  
402 insertions in the nuclear gene c-myc: a novel gene in avian phylogenetics. *The Auk* **117**, 1069–  
1178 (2000).
- 404 9. Johansson, U. S., Irestedt, M., Parsons, T. J. & Ericson, P. G. P. Basal phylogeny of the  
tyrannoidea based on comparisons of cytochrome b and exons of nuclear c-myc and RAG-1  
406 genes. *The Auk* **119**, 984 (2002).
10. Boekhorst, J. & Snel, B. Identification of homologs in insignificant blast hits by exploiting  
408 extrinsic gene properties. *BMC Bioinformatics* **8**, 356 (2007).
11. Zhan, X. *et al.* Exonic versus intronic SNPs: contrasting roles in revealing the population  
410 genetic differentiation of a widespread bird species. *Heredity* **114**, 1–9 (2015).
12. Remm, M., Mairo, Christian, E. S. & Erik, L. S. Automatic clustering of orthologs and in-paralogs  
412 from pairwise species comparisons. *J. Mol. Biol.* **314**, 1041–1052 (2001).
13. Thomson, R. C., Wang, I. J. & Johnson, J. R. Genome-enabled development of DNA markers  
414 for ecology, evolution and conservation. *Mol. Ecol.* **19**, 2184–2195 (2010).
14. Che, L.-H. *et al.* Genome-wide survey of nuclear protein-coding markers for beetle

- 416 phylogenetics and their application in resolving both deep and shallow-level divergences. *Mol.*  
417 *Ecol. Resour.* (2017).
- 418 15. Li, C., Ortí, G., Zhang, G. & Lu, G. A practical approach to phylogenomics: the phylogeny of  
ray-finned fish (Actinopterygii) as a case study. *BMC Evol. Biol.* **7**, 44 (2007).
- 420 16. Shen, X. X., Liang, D., Feng, Y. J., Chen, M. Y. & Zhang, P. A versatile and highly efficient  
421 toolkit including 102 nuclear markers for vertebrate phylogenomics, tested by resolving the  
422 higher level relationships of the Caudata. *Mol. Biol. Evol.* **30**, 2235–2248 (2013).
- 423 17. Fong, J. J. & Fujita, M. K. Evaluating phylogenetic informativeness and data-type usage for  
424 new protein-coding genes across Vertebrata. *Mol. Phylogenet. Evol.* **61**, 300–307 (2011).
- 425 18. Jetz, W., Thomas, G. H., Joy, J. B., Hartmann, K. & Mooers, A. O. The global diversity of birds  
426 in space and time. *Nature* **491**, 444–448 (2012).
- 427 19. Berv, J. S. & Prum, R. O. A comprehensive multilocus phylogeny of the Neotropical cotingas  
428 (Cotingidae, Aves) with a comparative evolutionary analysis of breeding system and plumage  
dimorphism and a revised phylogenetic classification. *Mol. Phylogenet. Evol.* **81**, 120–136  
430 (2014).
- 431 20. Hackett, S. J. *et al.* A phylogenomic study of birds reveals their evolutionary history. *Science*  
432 **320**, 1763–1768 (2008).
- 433 21. Jønsson, K. A. *et al.* A supermatrix phylogeny of corvid passerine birds (Aves: Corvides). *Mol.*  
434 *Phylogenet. Evol.* **94**, 87–94 (2016).
- 435 22. Backström, N., Sætre, G.-P. & Ellegren, H. Inferring the demographic history of european  
436 ficedula, flycatcher populations. *BMC Evol. Biol.* **13**, 2 (2013).
- 437 23. Chu, J.-H. *et al.* Inferring the geographic mode of speciation by contrasting autosomal and sex-  
438 linked genetic diversity. *Mol. Biol. Evol.* **30**, 2519–2530 (2013).
- 439 24. Dong, F. *et al.* Molecular systematics and plumage coloration evolution of an enigmatic babbler  
440 (*Pomatorhinus ruficollis*) in East Asia. *Mol. Phylogenet. Evol.* **70**, 76–83 (2014).
- 441 25. Wang, N. *et al.* Incipient speciation with gene flow on a continental island: Species delimitation  
442 of the Hainan Hwamei (*Leucodioptron canorum owstoni*, Passeriformes, Aves). *Mol.*  
*Phylogenet. Evol.* **102**, 62–73 (2016).
- 443 26. Yeung, C. K. L. *et al.* Beyond a morphological paradox: Complicated phylogenetic  
444 relationships of the parrotbills (Paradoxornithidae, Aves). *Mol. Phylogenet. Evol.* **61**, 192–202

- 446 (2011).
27. Hung, C.-M., Drovetski, S. V. & Zink, R. M. Matching loci surveyed to questions asked in  
448 phylogeography. *Proc. R. Soc. B Biol. Sci.* **283**, 20152340 (2016).
28. Lim, H. C. & Sheldon, F. H. Multilocus analysis of the evolutionary dynamics of rainforest bird  
450 populations in Southeast Asia: population history of Sundaland birds. *Mol. Ecol.* **20**, 3414–  
3438 (2011).
- 452 29. Shaner, P.-J. L. *et al.* Climate niche differentiation between two passerines despite ongoing gene  
flow. *J. Anim. Ecol.* **84**, 829–839 (2015).
- 454 30. Wang, P. *et al.* The role of niche divergence and geographic arrangement in the speciation of  
Eared Pheasants ( *Crossoptilon*, Hodgson 1938). *Mol. Phylogenet. Evol.* **113**, 1–8 (2017).
- 456 31. Burleigh, J. G., Kimball, R. T. & Braun, E. L. Building the avian tree of life using a large-scale,  
sparse supermatrix. *Mol. Phylogenet. Evol.* **84**, 53–63 (2015).
- 458 32. Irestedt, M., Fjeldså, J., Johansson, U. S. & Ericson, P. G. . Systematic relationships and  
biogeography of the tracheophone suboscines (Aves: Passeriformes). *Mol. Phylogenet. Evol.*  
460 **23**, 499–512 (2002).
33. Helbig, A. J., Kocum, A., Seibold, I. & Braun, M. J. A multi-gene phylogeny of aquiline eagles  
462 (Aves: Accipitriformes) reveals extensive paraphyly at the genus level. *Mol. Phylogenet. Evol.*  
**35**, 147–164 (2005).
- 464 34. Ericson, P. G. P. *et al.* Higher-level phylogeny and morphological evolution of tyrant flycatchers,  
cotingas, manakins, and their allies (Aves: Tyrannida). *Mol. Phylogenet. Evol.* **40**, 471–483  
466 (2006).
35. Dawson, D. A. *et al.* New methods to identify conserved microsatellite loci and develop primer  
468 sets of high cross-species utility - as demonstrated for birds. *Mol. Ecol. Resour.* **10**, 475–494  
(2010).
- 470 36. Backström, N., Fagerberg, S. & Ellegren, H. Genomics of natural bird populations: a gene-  
based set of reference markers evenly spread across the avian genome. *Mol. Ecol.* **17**, 964–980  
472 (2007).
37. Kimball, R. T. *et al.* A well-tested set of primers to amplify regions spread across the avian  
474 genome. *Mol. Phylogenet. Evol.* **50**, 654–660 (2009).
38. Kerr, K. C. R., Cloutier, A. & Baker, A. J. One hundred new universal exonic markers for birds

- 476 developed from a genomic pipeline. *J. Ornithol.* **155**, 561–569 (2014).
39. Chojnowski, J. L., Kimball, R. T. & Braun, E. L. Introns outperform exons in analyses of basal  
478 avian phylogeny using clathrin heavy chain genes. *Gene* **410**, 89–96 (2008).
40. Brito, P. H. & Edwards, S. V. Multilocus phylogeography and phylogenetics using sequence-  
480 based markers. *Genetica* **135**, 439–455 (2009).
41. Jarvis, E. D. *et al.* Whole-genome analyses resolve early branches in the tree of life of modern  
482 birds. *science* **346**, 1320–1331 (2014).
42. Cibois, A. & Cracraft, J. Assessing the passerine “Tapestry”: phylogenetic relationships of the  
484 Muscicapoidae inferred from nuclear DNA sequences. *Mol. Phylogenet. Evol.* **32**, 264–273  
(2004).
- 486 43. Paton, T. A., Baker, A. J., Groth, J. G. & Barrowclough, G. F. RAG-1 sequences resolve  
phylogenetic relationships within Charadriiform birds. *Mol. Phylogenet. Evol.* **29**, 268–278  
488 (2003).
44. Prum, R. O. *et al.* A comprehensive phylogeny of birds (Aves) using targeted next-generation  
490 DNA sequencing. *Nature* **526**, 569–573 (2015).
45. Suh, A., Smeds, L. & Ellegren, H. The Dynamics of Incomplete Lineage Sorting across the  
492 Ancient Adaptive Radiation of Neoavian Birds. *PLOS Biol.* **13**, e1002224 (2015).
46. Suh, A. The phylogenomic forest of bird trees contains a hard polytomy at the root of Neoaves.  
494 *Zool. Scr.* **45**, 50–62 (2016).
47. Salas-Leiva, D. E. *et al.* Conserved genetic regions across angiosperms as tools to develop  
496 single-copy nuclear markers in gymnosperms: an example using cycads. *Mol. Ecol. Resour.* **14**,  
831–845 (2014).
- 498 48. Waters, J. M., Rowe, D. L., Burrige, C. P. & Wallis, G. P. Gene Trees versus Species Trees:  
Reassessing life-History evolution in a freshwater fish radiation. *Syst. Biol.* **59**, 504–517 (2010).
- 500 49. Edwards, S. V. Is a new and general theory of molecular systematics emerging? *Evolution* **63**,  
1–19 (2009).
- 502 50. Szöllösi, G. J., Tannier, E., Daubin, V. & Boussau, B. The Inference of Gene Trees with Species  
Trees. *Syst. Biol.* **64**, e42–e62 (2015).
- 504 51. McCormack, J. E. *et al.* A phylogeny of birds based on over 1,500 loci collected by target  
enrichment and high-throughput sequencing. *PLoS ONE* **8**, e54848 (2013).

- 506 52. Maddison, W. P. & Knowles, L. L. Inferring Phylogeny Despite Incomplete Lineage Sorting.  
*Syst. Biol.* **55**, 21–30 (2006).
- 508 53. Galbusera, P., Dongen, S. van & Matthysen, E. Cross-species amplification of microsatellite  
primers in passerine birds. *Conserv. Genet.* 163–168 (2000).
- 510 54. Wang, B. *et al.* Development and characterization of novel microsatellite markers for the  
Common Pheasant (*Phasianus colchicus*) using RAD-seq. *Avian Res.* **8**, (2017).
- 512 55. Sunnucks, P. Efficient genetic markers for population biology. *Trends Ecol. Evol.* **15**, 199–203  
(2000).
- 514 56. Freamo, H., O’Reilly, P., Berg, P. R., Lien, S. & Boulding, E. G. Outlier SNPs show more  
genetic structure between two Bay of Fundy metapopulations of Atlantic salmon than do neutral  
516 SNPs. *Mol. Ecol. Resour.* **11**, 254–267 (2015).
57. Baptiste, E. *et al.* The analysis of 100 genes supports the grouping of three highly divergent  
518 amoebae: *Dictyostelium*, *Entamoeba*, and *Mastigamoeba*. *Proc. Natl. Acad. Sci.* **99**, 1414–1419  
(2002).
- 520 58. Edwards, S. & Bensch, S. Looking forwards or looking backwards in avian phylogeography?  
A comment on Zink and Barrowclough 2008. *Mol. Ecol.* **18**, 2930–2933 (2009).
- 522 59. Beaumont, M. A., Zhang, W. & Balding, D. J. Approximate Bayesian computation in  
population genetics. *Genetics* **162**, 2025–2035 (2002).
- 524 60. Küpper, C. *et al.* High gene flow on a continental scale in the polyandrous Kentish plover  
*Charadrius alexandrinus*. *Mol. Ecol.* **21**, 5864–5879 (2012).
- 526 61. Rheindt, F. E. *et al.* Conflict between Genetic and Phenotypic Differentiation: The Evolutionary  
History of a ‘Lost and Rediscovered’ Shorebird. *PLoS ONE* **6**, e26995 (2011).
- 528 62. Nosenko, T. *et al.* Deep metazoan phylogeny: when different genes tell different stories. *Mol.*  
*Phylogenet. Evol.* **67**, 223–233 (2013).
- 530 63. Zink, R. M. & Barrowclough, G. F. Mitochondrial DNA under siege in avian phylogeography.  
*Mol. Ecol.* **17**, 2107–2121 (2008).
- 532 64. Smith, B. T. & Klicka, J. Examining the role of Effective population size on mitochondrial and  
multilocus divergence time discordance in a songbird. *PLoS ONE* **8**, e55161 (2013).
- 534 65. Thorne, J. L. & Kishino, H. Divergence time and evolutionary rate estimation with multilocus  
data. *Syst. Biol.* **51**, 689–702 (2002).

- 536 66. Liu, L., Yu, L. & Edwards, S. V. A maximum pseudo-likelihood approach for estimating species  
trees under the coalescent model. *BMC Evol. Biol.* **10**, 302 (2010).
- 538 67. Drummond, A. J., Suchard, M. A., Xie, D. & Rambaut, A. Bayesian Phylogenetics with  
BEAUti and the BEAST 1.7. *Mol. Biol. Evol.* **29**, 1969–1973 (2012).
- 540 68. Yang, Z. & Rannala, B. Bayesian species delimitation using multilocus sequence data. *Proc.*  
*Natl. Acad. Sci. U. S. A.* **107**, 9264–9269 (2010).
- 542 69. Hey, J. Multilocus Methods for Estimating Population Sizes, Migration Rates and Divergence  
Time, With Applications to the Divergence of *Drosophila pseudoobscura* and *D. persimilis*.  
544 *Genetics* **167**, 747–760 (2004).
70. Hey, J. & Nielsen, R. Integration within the Felsenstein equation for improved Markov chain  
546 Monte Carlo methods in population genetics. *Proc. Natl. Acad. Sci.* **104**, 2785–2790 (2007).
71. McCormack, J. E., Hird, S. M., Zellmer, A. J., Carstens, B. C. & Brumfield, R. T. Applications  
548 of next-generation sequencing to phylogeography and phylogenetics. *Mol. Phylogenet. Evol.*  
**66**, 526–538 (2013).
- 550 72. Roure, B., Baurain, D. & Philippe, H. Impact of Missing Data on Phylogenies Inferred from  
Empirical Phylogenomic Data Sets. *Mol. Biol. Evol.* **30**, 197–214 (2013).
- 552 73. Lande, R. Natural selection and random genetic drift in phenotypic evolution. *Evolution* **30**,  
314–334 (1976).
- 554 74. Felsenstein, J. Cases in which parsimony or compatibility methods will be positively  
misleading. *Syst. Biol.* **27**, 401–410 (1978).
- 556 75. Kimball, R. T., Wang, N., Heimer-McGinn, V., Ferguson, C. & Braun, E. L. Identifying  
localized biases in large datasets: A case study using the avian tree of life. *Mol. Phylogenet.*  
558 *Evol.* **69**, 1021–1032 (2013).
76. Nam, K. *et al.* Molecular evolution of genes in avian genomes. *Genome Biol.* **11**, R68 (2010).
- 560 77. Rozen, S. & Skaletsky, H. Primer3 on the WWW for general users and for biologist  
programmers. in *Bioinformatics methods and protocols* **132**, 365–386 (Humana Press, 2000).
- 562 78. Don, R. H., Cox, P. T., Wainwright, B. J., Baker, K. & Mattick, J. S. ‘Touchdown’ PCR to  
circumvent spurious priming during gene amplification. *Nucleic Acids Res.* **19**, 4008–4008  
564 (1991).
79. Tamura, K., Stecher, G., Peterson, D., Filipiński, A. & Kumar, S. MEGA6: Molecular



- 566 Evolutionary Genetics Analysis Version 6.0. *Mol. Biol. Evol.* **30**, 2725–2729 (2013).
80. Weir, J. T. & Schluter, D. Calibrating the avian molecular clock. *Mol. Ecol.* **17**, 2321–2328  
568 (2008).
81. Li, J. W. *et al.* Rejecting strictly allopatric speciation on a continental island: prolonged  
570 postdivergence gene flow between Taiwan ( *Leucodioptron taewanus* , Passeriformes  
Timaliidae) and Chinese ( *L. canorum canorum* ) hwameis. *Mol. Ecol.* **19**, 494–507 (2010).
- 572 82. Stamatakis, A. RAxML version 8: a tool for phylogenetic analysis and post-analysis of large  
phylogenies. *Bioinformatics* **30**, 1312–1313 (2014).
- 574 83. Hillis, D. M. & Bull, J. J. An empirical test of bootstrapping as a method for assessing  
confidence in phylogenetic analysis. *Syst. Biol.* **42**, 182–192 (1993).
- 576 84. Küpper, C. *et al.* Kentish versus Snowy Plover: Phenotypic and Genetic Analyses of  
*Charadrius alexandrinus* Reveal Divergence of Eurasian and American Subspecies. *The Auk*  
578 **126**, 839–852 (2009).
85. Swindell, S. R. & Plasterer, T. N. SEQMAN. *Seq. Data Anal. Guideb.* 75–89 (1997).
- 580 86. Librado, P. & Rozas, J. DnaSP v5: a software for comprehensive analysis of DNA  
polymorphism data. *Bioinformatics* **25**, 1451–1452 (2009).
- 582 87. Hudson, R. R., Kreitman, M. & Aguadé, M. A test of neutral molecular evolution based on  
nucleotide data. *Genetics* **116**, 153–159 (1987).
- 584 88. Tajima, F. Statistical method for testing the neutral mutation hypothesis by DNA polymorphism.  
*Genetics* **123**, 585–595 (1989).
- 586

588 **Figure caption**

590 **Figure 1. PCR performance for the 136 NPCL marker candidates in 23 avian orders.** (A) Genetic relationships among our experimental samples. 41 species are highlighted in different colors representing 23 avian orders widely distributed in the avian phylogenetic tree. (B) PCR performance for 136 NPCL marker candidates. Each square represents a PCR result. Success is shown in black and failure in white. 430 of 5146 reactions that could not be produced due to a paucity of DNA are shown in grey. The gene name and PCR success rate of each NPCL marker are indicated to the left. The success rate of each avian order is indicated at the bottom of the matrix of 63 universal NPCL markers.

598 **Figure 2. PCR success rate distribution for the 136 NPCL marker candidates and mutation rates for the 63 universal NPCL markers.** (A) PCR success rate distribution for 136 candidates in 23 avian orders. The 63 NPCL markers with PCR success rates higher than 80% are shown in black; other loci with PCR success rates below 80% (in grey) were excluded from the subsequent analysis. The number above each bar shows the number of NPCL marker candidates. (B) Mutation and success rates for the 63 universal NPCL markers. The markers were sorted according to estimated mutation rates (bars in black) from low to high. The number on the right of each bar is the mutation rate of each NPCL marker. PCR success rates are shown underneath (bars in grey). The mutation rates of widely-used NPCL *RAG1* (in green) and mitochondrial gene *cyt b* (in blue) were selected as references.

608 **Figure 3. Chromosome mapping of the 63 avian universal NPCL markers in the genome of Zebra Finch (*Taeniopygia guttata*).** The 63 universal NPCL markers with more than 80% PCR success rate were widely distributed in 17 autosomal chromosomes and the Z chromosome.

612 **Figure 4. Phylogenetic analysis of Neoaves using 63 NPCLs from 48 bird species.** The names of species are abbreviated (refer to supplementary Table S4), representing 30 orders of Neoavian birds. Superorders are labelled on the nodes as classification in previous study<sup>41</sup> using genomic data. Bootstrap support over 70% are indicated above nodes.

616

**Figure 5. Polymorphism at 17 avian universal NPCL markers and two mitochondrial loci in four**  
618 **populations of Kentish Plover (*Charadrius alexandrinus*).** Markers were sorted according to their  
level of polymorphisms, from low to high. Gene names can be found at the bottom of the three box  
620 plots. Mitochondrial genes (in blue) were selected as references (A) Average number of nucleotide  
sites ranging from 0 to 10. (B) Haplotype diversity ranging from 0 to 0.97. (C) Nucleotide diversity  
622 ranging from 0 to 5.59.

624 **Figure 1**

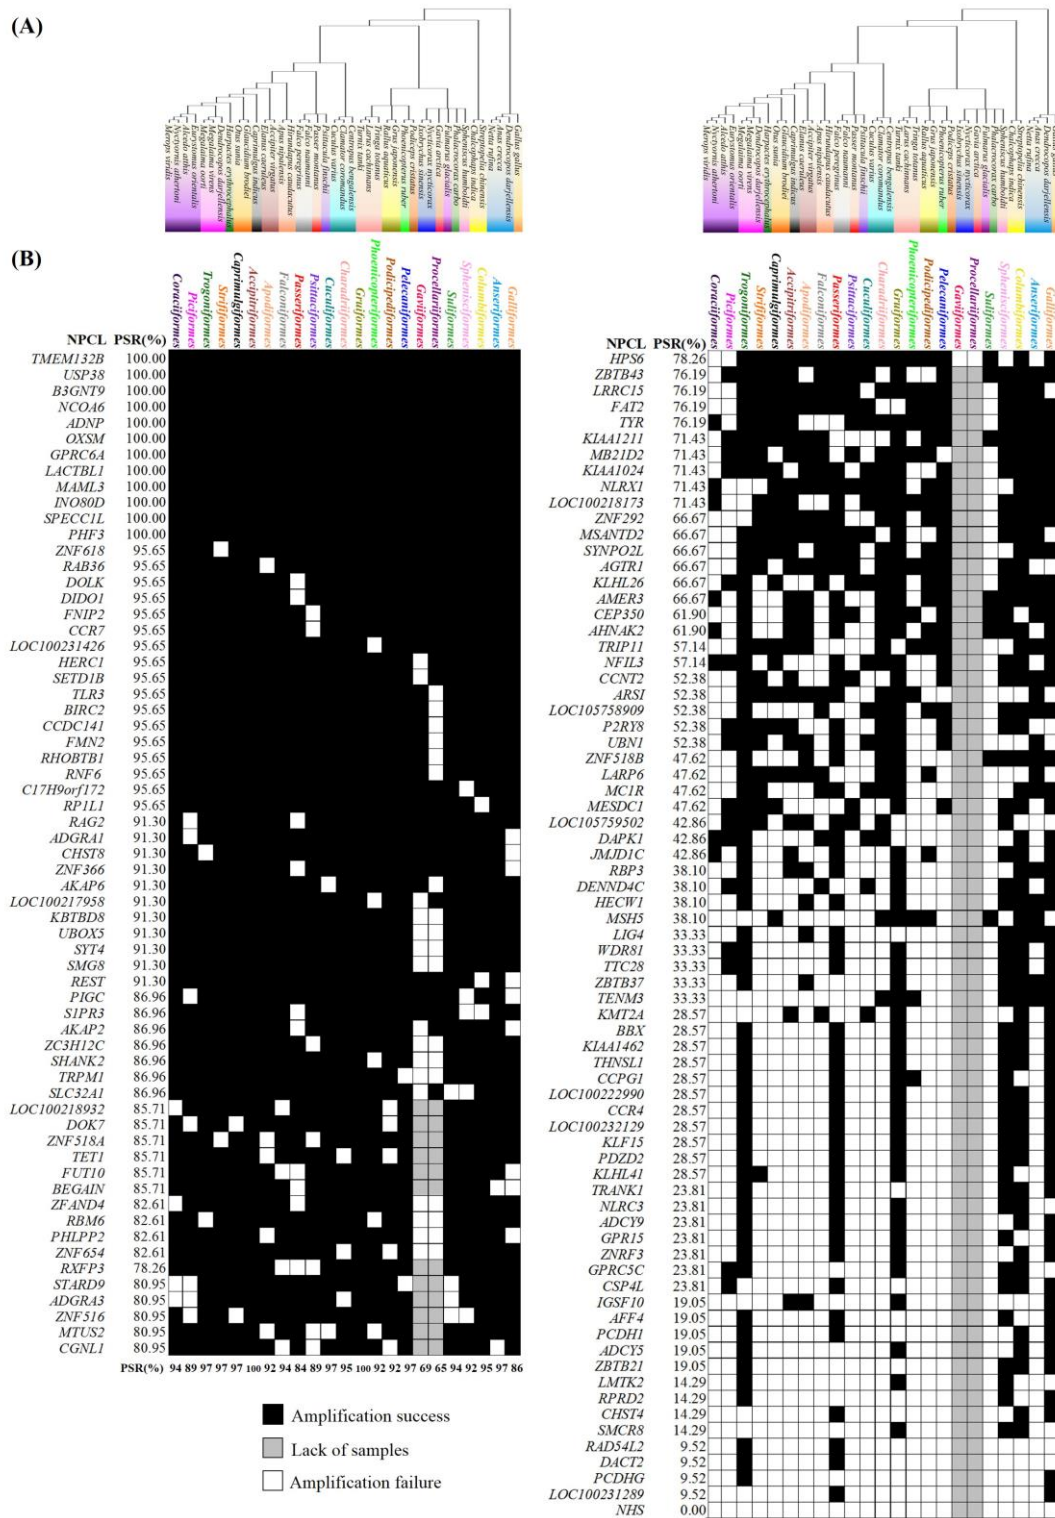

626

628

**Figure 2**

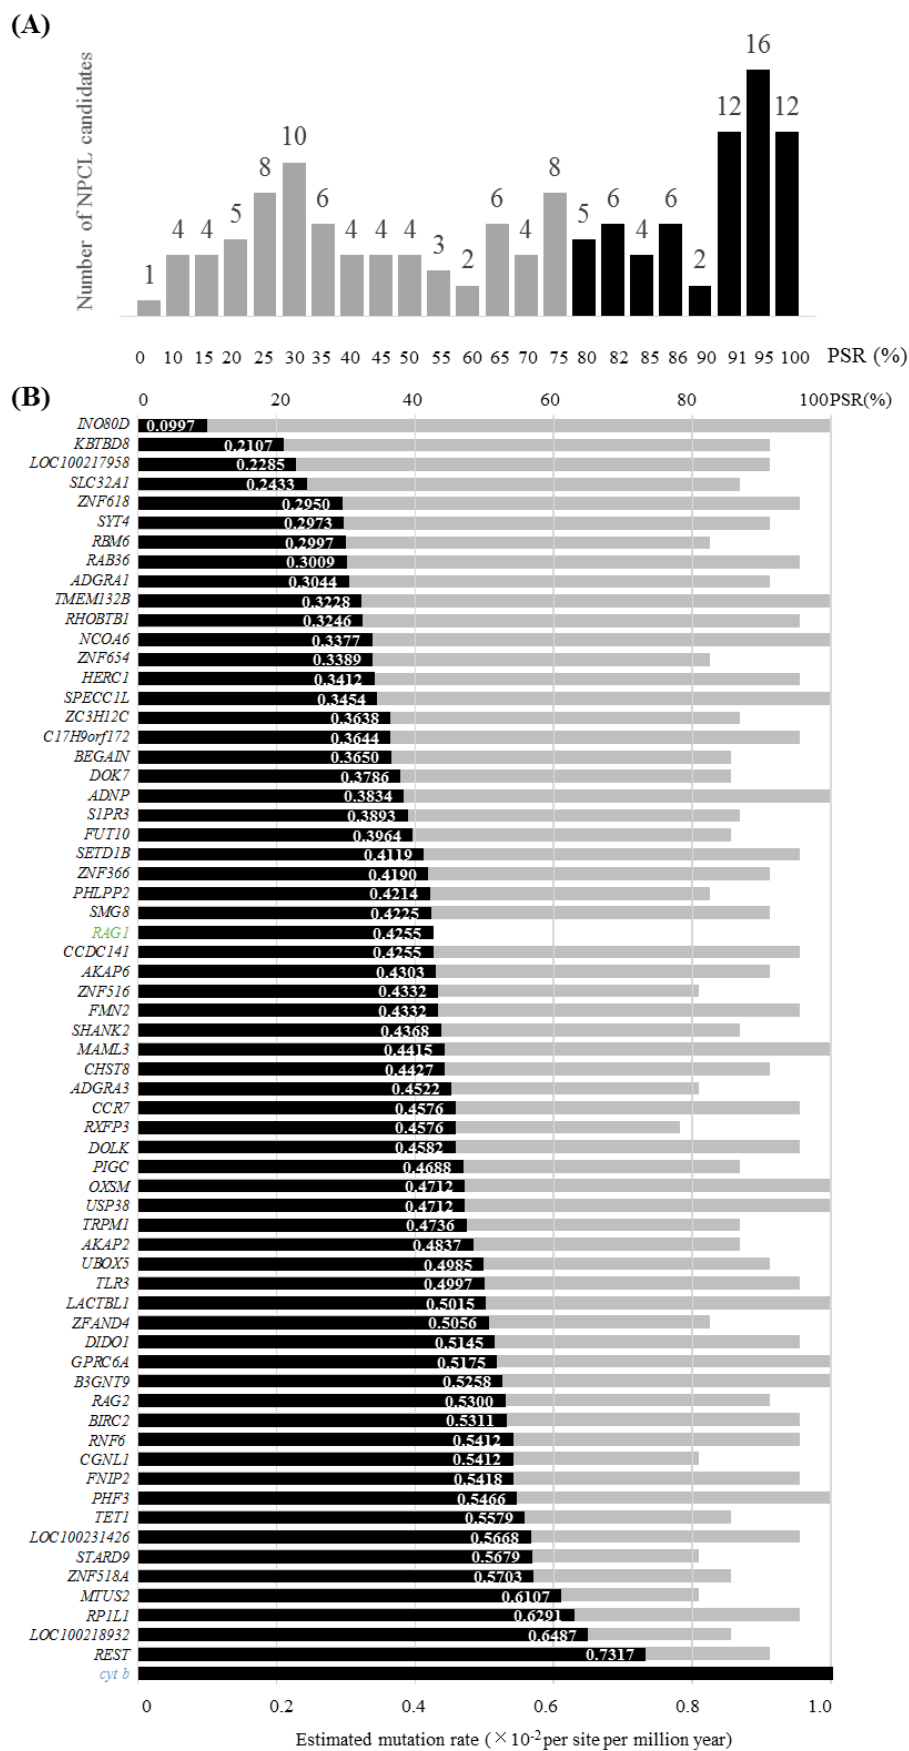

Figure 3

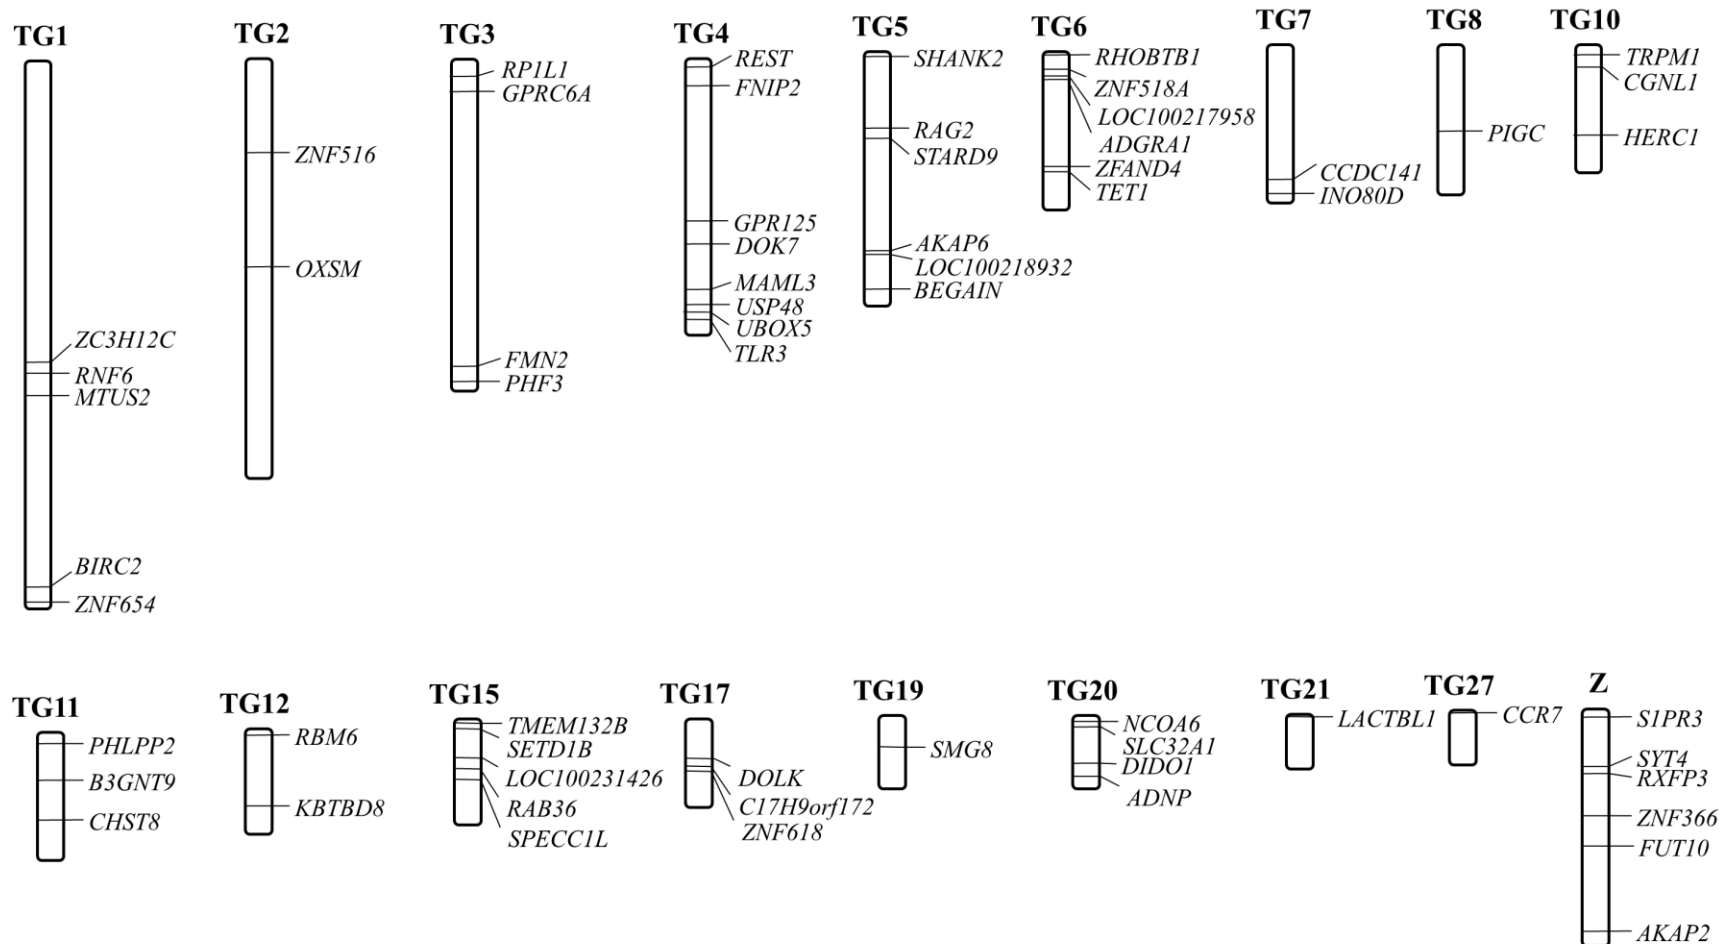

Figure 4

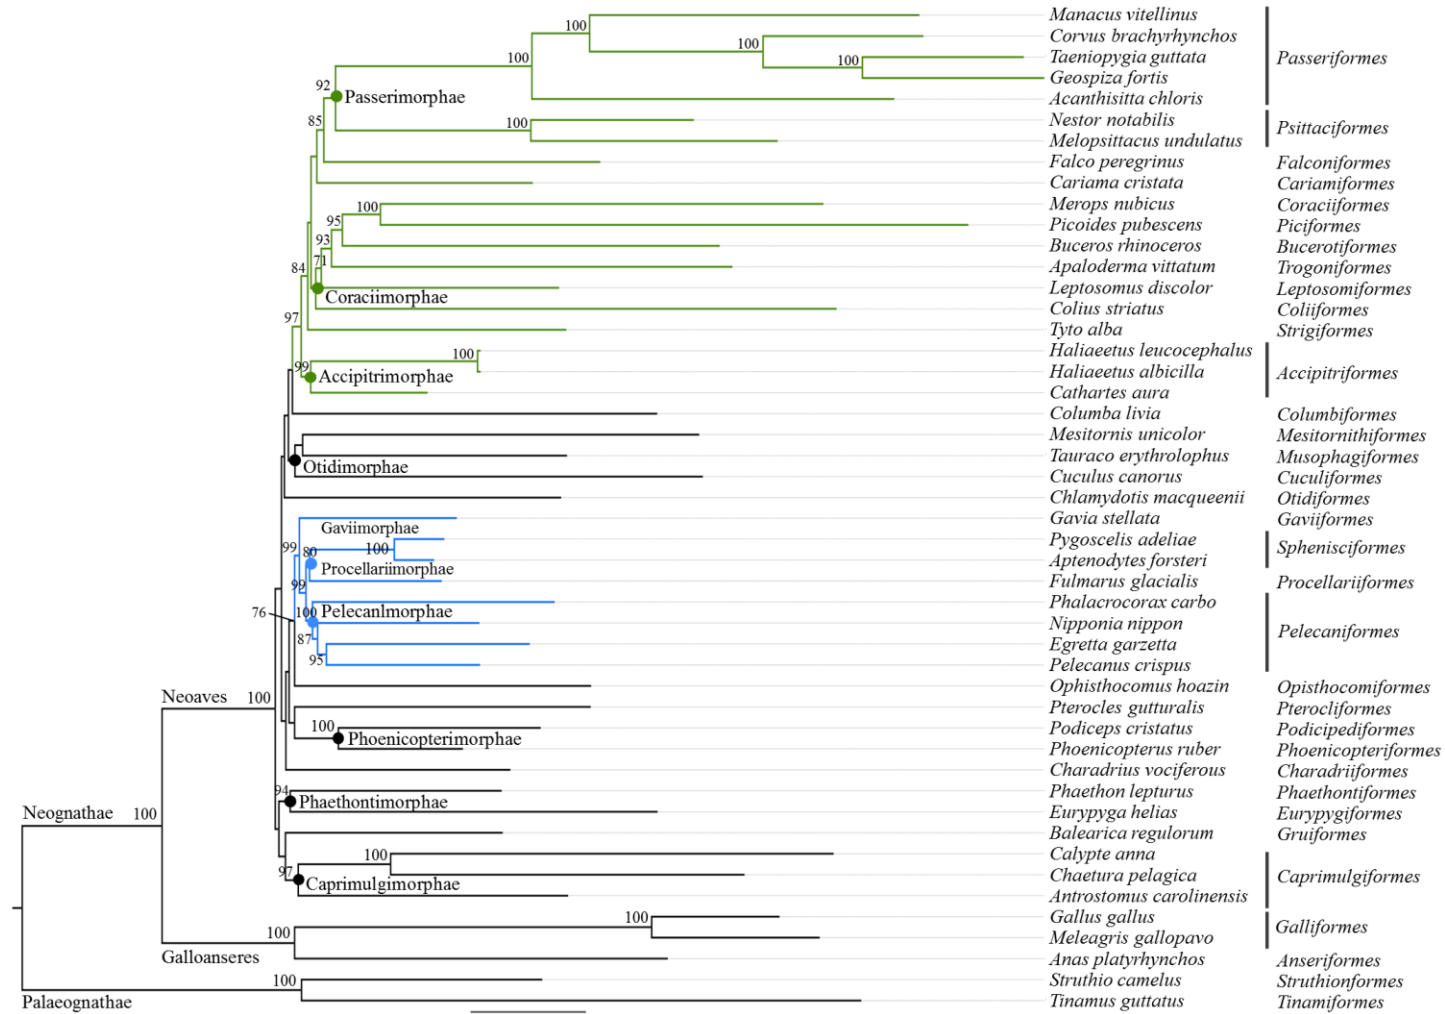

**Figure 5**

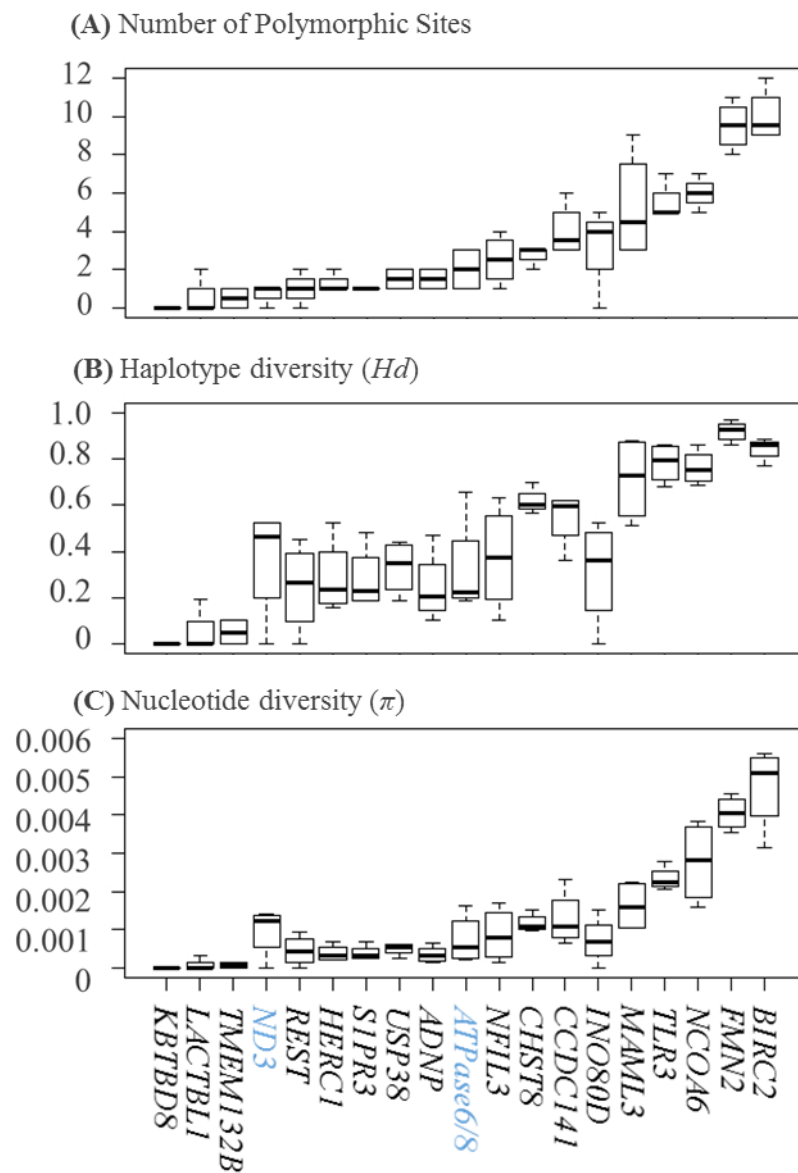

636
